# Supplementary material
Source: PubMed Central journal article supplement (PMC5243220)
Supplement: legends.pdf [file legends.pdf]

## Legends for supplemental videos

### Video S1

Characterization of the cardiac phenotype of  $^{SM22\alpha}CaSR^{\Delta flox/\Delta flox}$  mice. Cardiac cine MRI sequence of one heartbeat from three representative WT and three remodeled (5 out of 11 investigated hearts) KO hearts shown in long axis.

### Video S2

Characterization of the cardiac phenotype of  $^{SM22\alpha}CaSR^{\Delta flox/\Delta flox}$  mice. Representative video of one heartbeat of a WT mouse heart shown as 3D-reconstruction of the left ventricular endocardium (red) intersected with short and long axis image planes (black and white) from cardiac cine MRI.

### Video S3

Characterization of the cardiac phenotype of  $^{SM22\alpha}CaSR^{\Delta flox/\Delta flox}$  mice. The left ventricle of remodeled hearts from KO mice exhibits full apical closure. Representative video of one heartbeat of a remodeled (5 out of 11 investigated hearts) KO mouse heart shown as 3D-reconstruction of the left ventricular endocardium (red) intersected with short and long axis image planes (black and white) from cardiac cine MRI.
